# Supplementary material for: Ovatodiolide Inhibits Breast Cancer Stem/Progenitor Cells through SMURF2-Mediated Downregulation of Hsp27
Source: PubMed Central journal article supplement (PMC4885042; doi:10.3390/toxins8050127), 2016-04-28
Supplement: toxins-08-00127-s001.pdf [file toxins-08-00127-s001.pdf]

## Supplementary Materials: Ovatodiolide Inhibits Breast Cancer Stem/Progenitor Cells through SMURF2-Mediated Downregulation of Hsp27

Kuan-Ta Lu, Bing-Yen Wang, Wan-Yu Chi, Ju Chang-Chien, Jiann-Jou Yang, Hsueh-Te Lee, Yew-Min Tzeng and Wen-Wei Chang

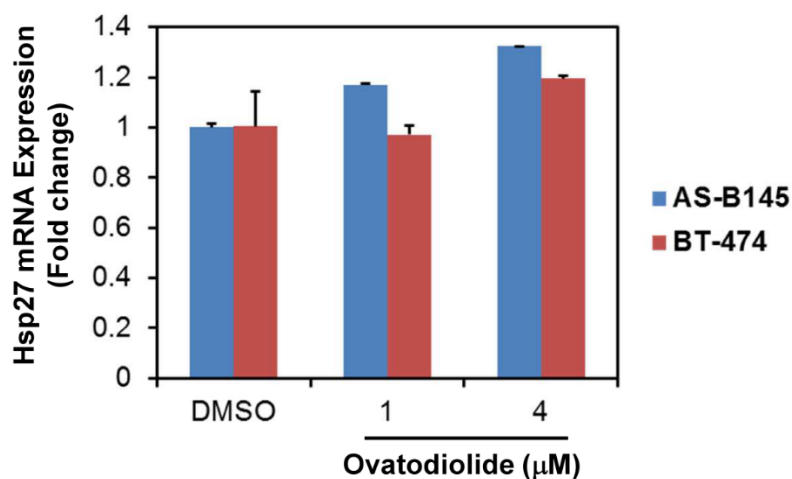

**Figure S1.** Ovatodiolide did not inhibit Hsp27 mRNA expression in BCSCs. BCSCs were enriched by primary mammosphere cultivation from AS-B145 or BT-474 breast cancer cells and dissociated into single cell suspension followed by treated with ovatodiolide (1 or 4  $\mu\text{M}$ ) or 0.1% DMSO for 48 h. Total RNA were then extracted and the Hsp27 mRNA expression was determined by SYBR Green-based qRT-PCR method.
